# Supplementary material
Source: MDPI journal article supplement (https://www.mdpi.com/search?q=minerals-09-00298)
Supplement: s001 [file minerals-09-00298-s001.pdf]

## Supplementary Materials: Enhanced Potential Toxic Metal Removal Using a Novel Hierarchical $\text{SiO}_2\text{-Mg}(\text{OH})_2$ Nanocomposite Derived from Sepiolite

Qi-Zhi Yao, Sheng-Hui Yu, Tian-Lei Zhao, Fei-Jin Qian, Han Li, Gen-Tao Zhou and Sheng-Quan Fu

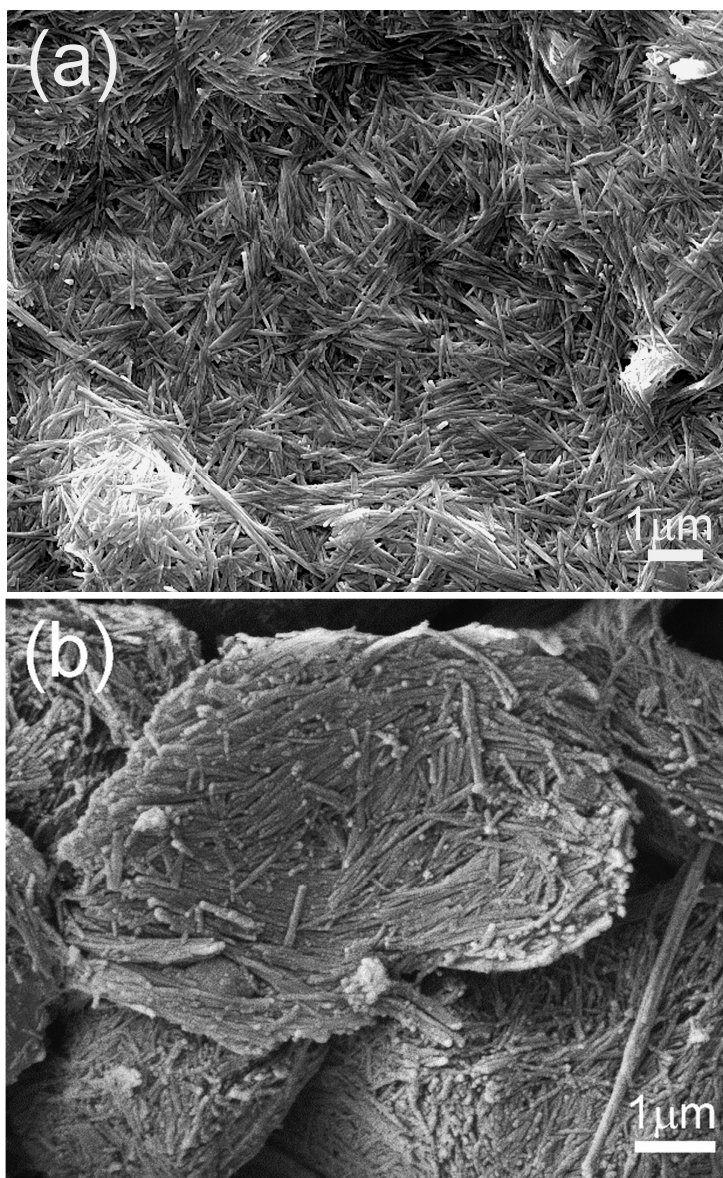

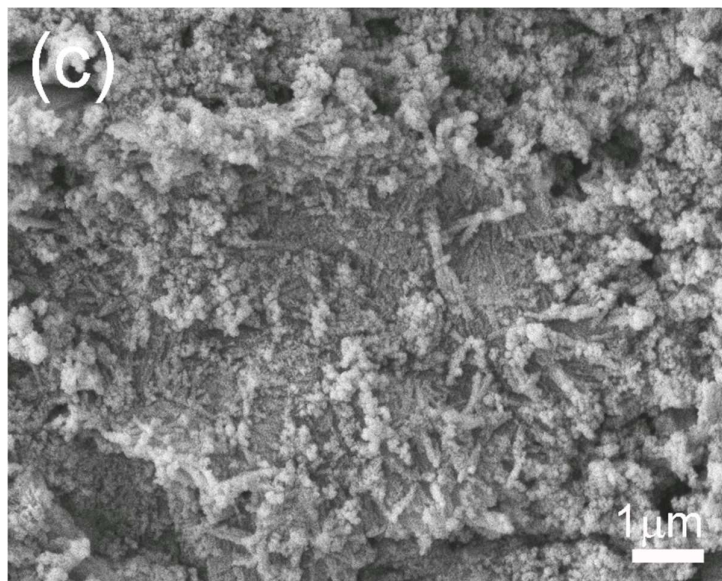

**Figure S1.** Typical SEM images of raw sepiolite (a), acid-activated sepiolite (b), and sepiolite modified by sequential acid–base treatment (c).

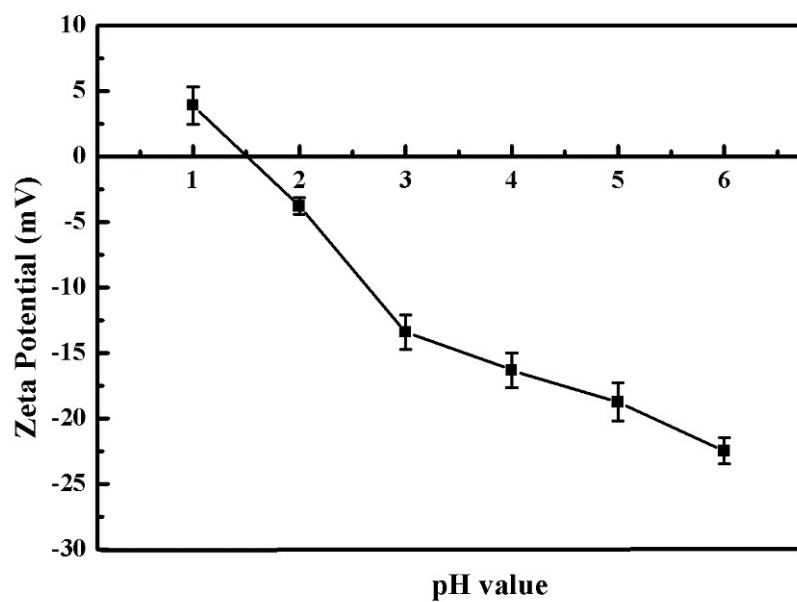

**Figure S2.** Zeta potential-pH profile for the  $\text{SiO}_2\text{-Mg(OH)}_2$  nanocomposite in deionized water.

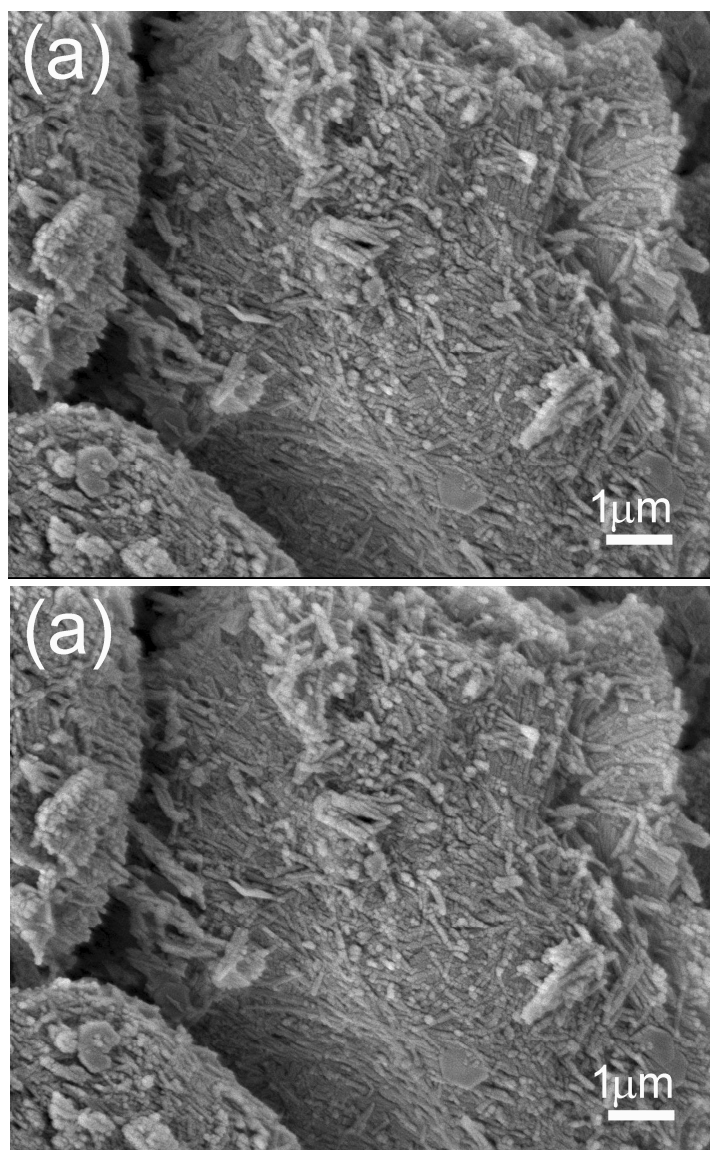

**Figure S3.** SEM images of Pb(II)-loaded  $\text{SiO}_2\text{-Mg}(\text{OH})_2$  nanocomposite (a) and Cd(II)-loaded  $\text{SiO}_2\text{-Mg}(\text{OH})_2$  nanocomposite (b).
